# Supplementary material for: Facile synthesis of N, P-doped carbon dots from maize starch via a solvothermal approach for the highly sensitive detection of Fe3+
Source: Royal Society of Chemistry journal article supplement (doi:10.1039/d0ra06209j), 2020-01-01
Supplement: d0ra06209j1.pdf [file d0ra06209j1.pdf]

## Supplementary Information

### **Facile Synthesis of N, P-doped Carbon Dots from Maize Starch via Solvothermal Approach for the Highly Sensitive Detection of Fe<sup>3+</sup>**

Guohua Dong,<sup>a</sup> Kun Lang,<sup>a</sup> He Ouyang,<sup>c</sup> Wenzhi Zhang,<sup>a,\*</sup> Liming Bai,<sup>a</sup> Shijie Chen,<sup>a</sup> Zhuanfang Zhang,<sup>a</sup> Yueyue Gao,<sup>b,\*</sup> Zhonghua Mu,<sup>a</sup> and Xiaodan Zhao<sup>a</sup>

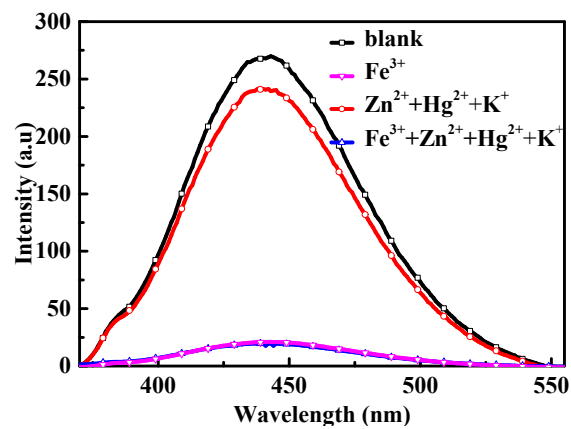

**Fig. S1** The fluorescence emission spectra of N, P-CDs solution with or without presence of Fe<sup>3+</sup> together with other mixed ions solutions.
